# Supplementary material for: Enhanced charge separation and increased oxygen vacancies of h-BN/OV-BiOCl for improved visible-light photocatalytic performance
Source: Royal Society of Chemistry journal article supplement (doi:10.1039/c9ra01639b), 2019-01-01
Supplement: c9ra01639b1.pdf [file c9ra01639b1.pdf]

## Supplementary Material

### **Enhanced charge separation and increased oxygen vacancies of h-BN/OV-BiOCl for improved visible light photocatalytic performance**

Wenhui He<sup>a</sup>, Yawen Wang<sup>a\*</sup>, Caimei Fan<sup>a\*</sup>, Yunfang Wang<sup>a</sup>, Xiaochao Zhang<sup>a</sup>, Jianxin Liu<sup>a</sup>, Rui Li<sup>a</sup>

*College of Chemistry and Chemical Engineering, Taiyuan University of Technology, Taiyuan 030024, China*

*Corresponding author: E-mail address: wangyawen@tyut.edu.cn (Dr. Yawen Wang), 1607232396@qq.com (Prof. Caimei Fan)*

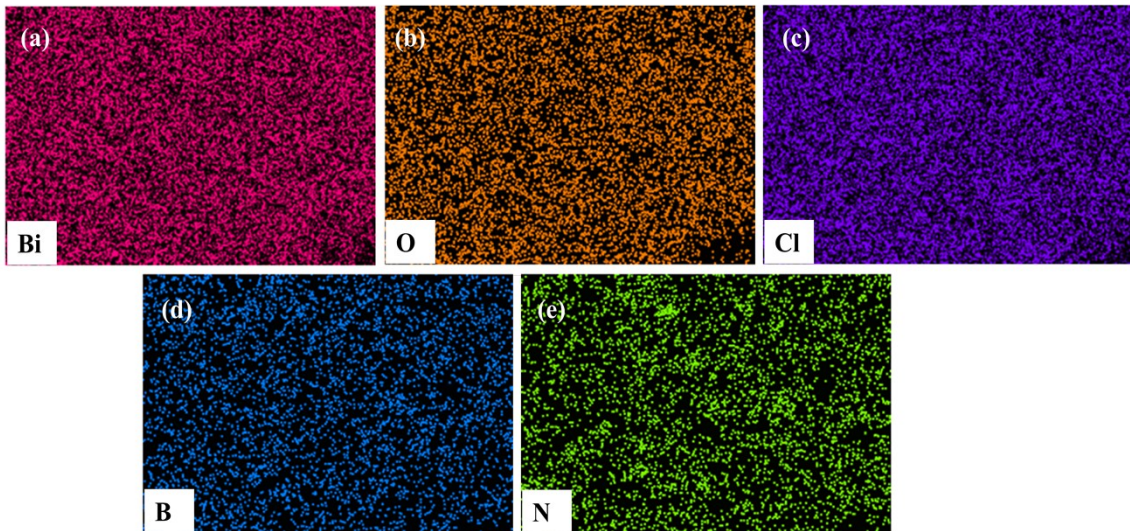

**Fig. S1** (a)-(e) the EDS elemental mapping of Bi, O, Cl, B and N in 5wt% h-BN/OV-BiOCl composite.

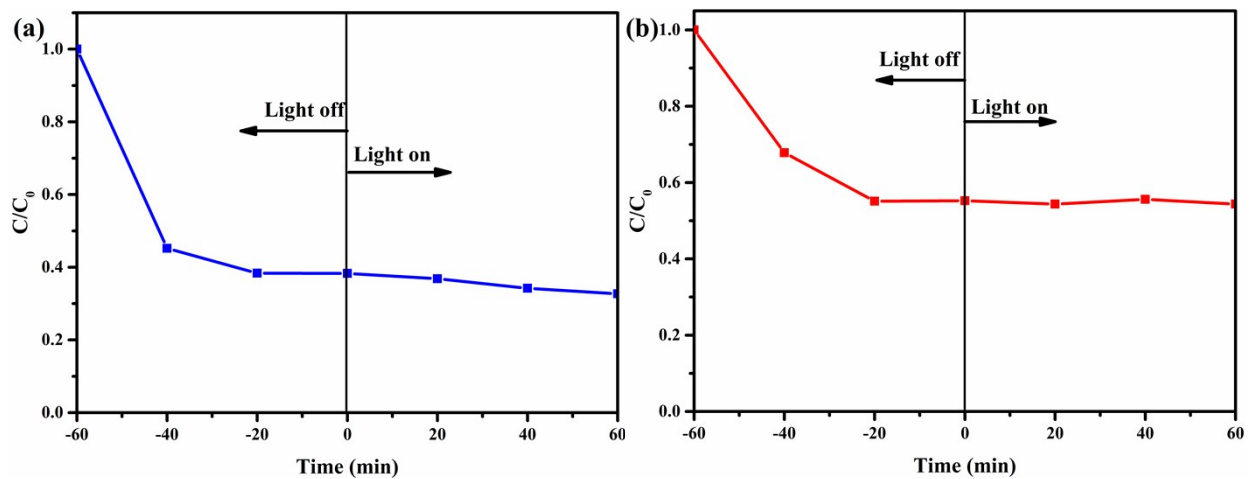

**Fig. S2** Adsorption and photocatalytic degradation curves of h-BN for (a) RhB and (b) BPA under visible light irradiation. (0.02 g and 0.05 g of h-BN were added in a RhB solution (100 mL, 50 mg/L) and BPA solution (100 mL, 50 mg/L)).

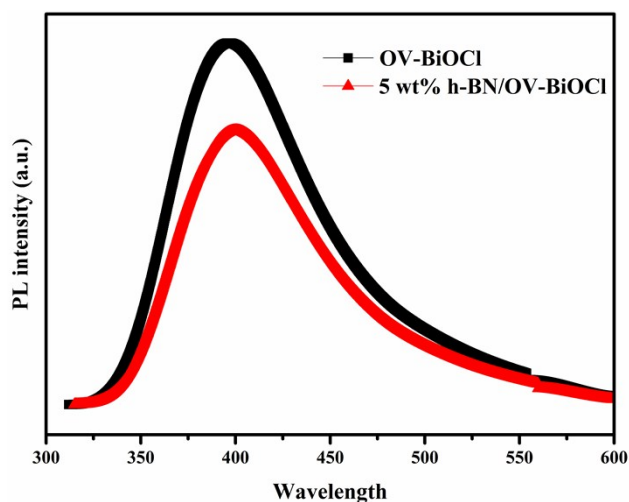

**Fig. S3** PL of OV-BiOCl and 5 wt% h-BN/OV-BiOCl samples.

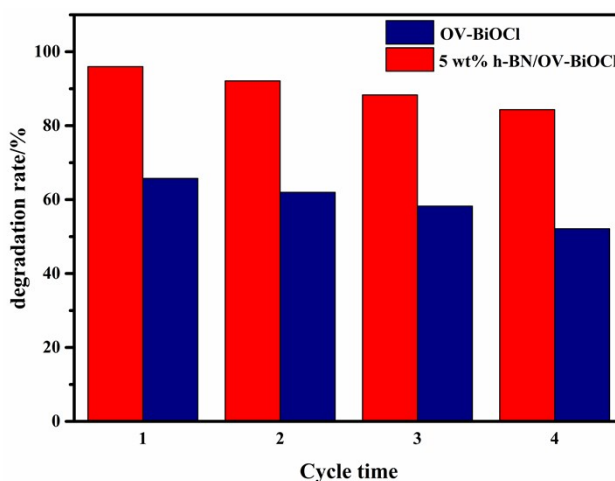

**Fig. S4** Cycling runs of OV-BiOCl and 5 wt% h-BN/OV-BiOCl photocatalysts for RhB degradation.

### Band-gap energy calculation process of OV-BiOCl and h-BN/OV-BiOCl

According to the formulas  $E_g = 1240/\lambda$  ( $\lambda$  is wavelength value that extension of every line slope intersects with abscissa),  $\lambda$  is about 371, 380, 391, 399 and 395 nm, and  $E_g$  is calculated about 3.34, 3.18, 3.17, 3.11 and 3.14 eV for OV-poor BiOCl, OV-BiOCl, 3 wt% h-BN/OV-BiOCl, 5 wt% h-BN/OV-BiOCl and 8 wt% h-BN/OV-BiOCl, respectively.

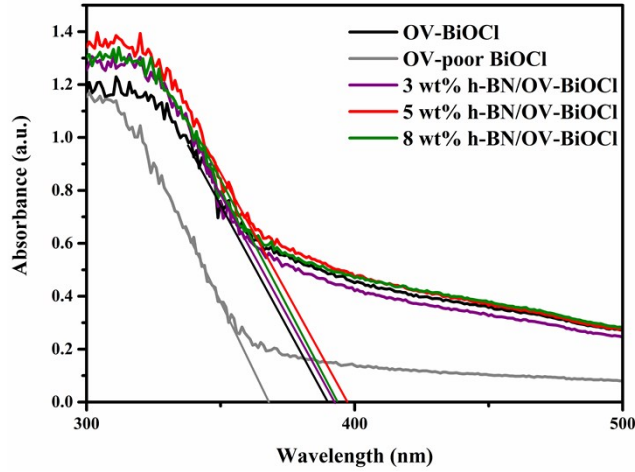

**Fig. S5** UV-vis diffuse reflectance spectra of OV-BiOCl, OV-poor BiOCl and h-BN/OV-BiOCl composites.

### Energy band calculation process of OV-BiOCl

According to the formulas  $E_{CB} = \chi (AaBbCc) - 1/2E_g + E_0$  and  $E_{VB} = E_{CB} + E_g$ , where  $E_g$  is the semiconductor band gap,  $E_{CB}$  is the conduction band minimum value,  $E_{VB}$  is the valence band maximum value,  $E_0$  is the free electron energy relative to the standard hydrogen electrode (-4.5 eV),  $\chi (AaBbCc)$  is the absolute electronegativity of the semiconductor  $AaBbCc$  calculated by the electronegativity geometric mean of the three elements, the value for BiOCl is calculated to be 6.34, and  $E_g$  is 3.18 eV acquired from DRS analysis. Moreover, the CB potential can be obtained by the formula  $E_{CB} = E_{VB} - E_g$ , the  $E_{VB}$  and  $E_{CB}$  of BiOCl are estimated 3.43 eV and 0.25 eV.
